# Supplementary material
Source: publisher figshare collection journal article supplement (https://acs.figshare.com/ndownloader/files/30598798)
Supplement: Supplementary file 1 [file 30598798]

## Sheet: OVERVIEW
Conversion factors used in calculation of erosion characterization factors
Sheet	Description
factors	Final conversion factors [% / Mg]
den Biggelaar	Compilation and analysis of data from den Biggelaar et al. (2004)

## Sheet: factors
No. crt.	SPAM short name	Global (mean)	Africa	Asia	Australia	Europe	Latin America	North America
1	whea	0.0150391	0.0150391	0.0224444	0.0150391	0.00495238	0.0196825	0.0130769
3	maiz	0.0339169	0.0328205	0.0435294	0.0339169	0.0339169	0.0494253	0.00989247
4	barl	0.0114159	0.0114159	0.0114159	0.00952381	0.0138667	0.0114159	0.0108571
5	pmil	0.0288889	0.0288889	0.0333333	0.0288889	0.0244444	0.0288889	0.0288889
6	smil	0.0288889	0.0288889	0.0333333	0.0288889	0.0244444	0.0288889	0.0288889
7	sorg	0.0182847	0.0214972	0.0214972	0.0214972	0.0214972	0.0214972	0.00222222
8	ocer	0.0204143	0.0214972	0.0214972	0.0214972	0.0214972	0.0214972	0.015
9	pota	0.00497487	0.00497487	0.00497487	0.00667899	0.00491228	0.00333333	0.00497487
10	swpo	0.0210338	0.0210338	0.0210338	0.0210338	0.0210338	0.0210338	0.0210338
11	yams	0.0210338	0.0210338	0.0210338	0.0210338	0.0210338	0.0210338	0.0210338
12	cass	0.0264	0.0264	0.0264	0.0264	0.0264	0.0264	0.0264
13	orts	0.0210338	0.0210338	0.0210338	0.0210338	0.0210338	0.0210338	0.0210338
14	bean	0.0216667	0.015	0.0216667	0.0216667	0.0216667	0.0333333	0.0166667
15	chic	0.022716	0.022716	0.022716	0.022716	0.022716	0.022716	0.022716
16	cowp	0.025	0.0366667	0.025	0.025	0.025	0.0133333	0.025
17	pige	0.022716	0.022716	0.022716	0.022716	0.022716	0.022716	0.022716
18	lent	0.022716	0.022716	0.022716	0.022716	0.022716	0.022716	0.022716
19	opul	0.022716	0.022716	0.022716	0.022716	0.022716	0.022716	0.022716
20	soyb	0.0214815	0.0214815	0.0214815	0.0214815	0.0222222	0.0292063	0.0130159
21	grou	0.022716	0.022716	0.022716	0.022716	0.022716	0.022716	0.022716
24	sunf	0.022716	0.022716	0.022716	0.022716	0.022716	0.022716	0.022716
25	rape	0.022716	0.022716	0.022716	0.022716	0.022716	0.022716	0.022716
26	sesa	0.022716	0.022716	0.022716	0.022716	0.022716	0.022716	0.022716
27	ooil	0.022716	0.022716	0.022716	0.022716	0.022716	0.022716	0.022716
28	sugc	0.0210338	0.0210338	0.0210338	0.0210338	0.0210338	0.0210338	0.0210338
29	sugb	0.0210338	0.0210338	0.0210338	0.0210338	0.0210338	0.0210338	0.0210338
	mean	0.0217687	0.022084	0.0229303	0.0219266	0.0213244	0.0229429	0.0194038	0.0217687
	min	0.00497487
	max	0.0339169

## Sheet: den Biggelaar
			records	duration	yield	mean	min	max	mean	min	max	mean	min	max		crop values			continent	crop group
				yr	Mg ha-1	Mg ha-1 cm-1			kg ha-1 Mg-1			% Mg-1				mean	min	max	median	mean
Grain crops	Maize	Africa	41	2	2.6	0.128	0.003	0.715	0.0853333	0.002	0.476667	0.0328205	0.000769231	0.183333
	Maize	Asia	4	2	1.7	0.111	0.097	0.143	0.074	0.0646667	0.0953333	0.0435294	0.0380392	0.0560784
	Maize	North America	131	4	6.2	0.092	-0.08	1.03	0.0613333	-0.0533333	0.686667	0.00989247	-0.00860215	0.110753
	Maize	Latin America	15	2	2.9	0.215	0.007	1.64	0.143333	0.00466667	1.09333	0.0494253	0.0016092	0.377011		0.0339169	0.00795387	0.181794
	Wheat	Asia	4	2	3	0.101	0.097	0.143	0.0673333	0.0646667	0.0953333	0.0224444	0.0215556	0.0317778
	Wheat	Australia	16	4	1.2	0.081	-0.003	0.355	0.054	-0.002	0.236667	0.045	-0.00166667	0.197222
	Wheat	Europe	8	4	3.5	0.026	-0.058	0.097	0.0173333	-0.0386667	0.0646667	0.00495238	-0.0110476	0.0184762
	Wheat	North America	64	5	2.6	0.051	-0.033	0.225	0.034	-0.022	0.15	0.0130769	-0.00846154	0.0576923
	Wheat	Latin America	1	3	2.1	0.062	0.062	0.062	0.0413333	0.0413333	0.0413333	0.0196825	0.0196825	0.0196825		0.0150391	0.00401245	0.0649702
	Barley	Asia	1	1	1.8	0.142	0.142	0.142	0.0946667	0.0946667	0.0946667	0.0525926	0.0525926	0.0525926
	Barley	Australia	2	3	2.8	0.04	0.036	0.044	0.0266667	0.024	0.0293333	0.00952381	0.00857143	0.0104762
	Barley	Europe	11	3	2.5	0.052	-0.023	0.174	0.0346667	-0.0153333	0.116	0.0138667	-0.00613333	0.0464
	Barley	North America	2	3	3.5	0.057	0.057	0.058	0.038	0.038	0.0386667	0.0108571	0.0108571	0.0110476		0.0114159	0.00443175	0.0226413
	Millet	Africa	1	1	0.4	0.187	0.187	0.187	0.124667	0.124667	0.124667	0.311667	0.311667	0.311667
	Millet	Asia	2	2	0.3	0.015	0.012	0.017	0.01	0.008	0.0113333	0.0333333	0.0266667	0.0377778
	Millet	Europe	2	2	0.3	0.011	0.005	0.018	0.00733333	0.00333333	0.012	0.0244444	0.0111111	0.04		0.0288889	0.0188889	0.0388889
	Oats	Australia	1	1	0.4	0.036	0.036	0.036	0.024	0.024	0.024	0.06	0.06	0.06
	Oats	North America	5	5	2	0.045	0.017	0.08	0.03	0.0113333	0.0533333	0.015	0.00566667	0.0266667		0.0375	0.0328333	0.0433333
	Sorghum	North America	17	17	4.2	0.014	-0.139	0.108	0.00933333	-0.0926667	0.072	0.00222222	-0.0220635	0.0171429		0.00222222	-0.0220635	0.0171429		0.0214972
Root crops	Potatoes	Latin America	1	1	20.2	0.101	0.101	0.101	0.0673333	0.0673333	0.0673333	0.00333333	0.00333333	0.00333333
	Potatoes	Australia	2	1	54.1	0.542	0	1.084	0.361333	0	0.722667	0.00667899	0	0.013358
	Potatoes	Europe	2	5	11.4	0.084	0.018	0.15	0.056	0.012	0.1	0.00491228	0.00105263	0.00877193		0.00497487	0.00146199	0.00848775
	Potatoes	North America	3	2	30.5				12.7	0	0	0.416393	0	0
	Cassava	Africa	2	4	15	0.594	0.535	0.653	0.396	0.356667	0.435333	0.0264	0.0237778	0.0290222		0.0264	0.0237778	0.0290222
	Carrots	Latin America	4	1	27.8	1.323	0	2.678	0.882	0	1.78533	0.0317266	0	0.0642206		0.0317266	0	0.0642206		0.0210338
Leguminous crops	Soybeans	Asia	4	1	0.9	-0.073	-0.344	-0.027	-0.0486667	-0.229333	-0.018	-0.0540741	-0.254815	-0.02
	Soybeans	Europe	1	10	0.6	0.02	0.02	0.02	0.0133333	0.0133333	0.0133333	0.0222222	0.0222222	0.0222222
	Soybeans	North America	43	2	2.1	0.041	-0.001	0.113	0.0273333	-0.000666667	0.0753333	0.0130159	-0.00031746	0.035873
	Soybeans	Latin America	4	4	2.1	0.092	0.048	0.134	0.0613333	0.032	0.0893333	0.0292063	0.0152381	0.0425397		0.0214815	0.012381	0.033545
	Beans	Africa	3	3	0.4	0.009	0.003	0.019	0.006	0.002	0.0126667	0.015	0.005	0.0316667
	Beans	North America	2	2	1.4	0.035	0.03	0.04	0.0233333	0.02	0.0266667	0.0166667	0.0142857	0.0190476
	Beans	Latin America	5	3	1.1	0.055	0.033	0.076	0.0366667	0.022	0.0506667	0.0333333	0.02	0.0460606		0.0216667	0.0130952	0.0322583
	Cowpeas	Africa	21	1	0.8	0.044	0.001	0.124	0.0293333	0.000666667	0.0826667	0.0366667	0.000833333	0.103333
	Cowpeas	Latin America	1	1	0.3	0.006	0.006	0.006	0.004	0.004	0.004	0.0133333	0.0133333	0.0133333		0.025	0.00708333	0.0583333		0.022716
		Africa														0.0277218			0.0296103
		Asia														0.0379749			0.0384314
		Australia														0.0303007			0.0272619
		Europe														0.0140796			0.0138667
		Latin America														0.0257201			0.0292063
		North America														0.011533			0.0130159
	Compilation [% / Mg]
	No. crt.	SPAM short name	Global	Africa	Asia	Australia	Europe	Latin America	North America
	1	whea	0.0150391	0.0150391	0.0224444	0.0150391	0.00495238	0.0196825	0.0130769
	3	maiz	0.0339169	0.0328205	0.0435294	0.0339169	0.0339169	0.0494253	0.00989247
	4	barl	0.0114159	0.0114159	0.0114159	0.00952381	0.0138667	0.0114159	0.0108571
	5	pmil	0.0288889	0.0288889	0.0333333	0.0288889	0.0244444	0.0288889	0.0288889
	6	smil	0.0288889	0.0288889	0.0333333	0.0288889	0.0244444	0.0288889	0.0288889
	7	sorg	0.0182847	0.0214972	0.0214972	0.0214972	0.0214972	0.0214972	0.00222222
	8	ocer	0.0204143	0.0214972	0.0214972	0.0214972	0.0214972	0.0214972	0.015
	9	pota	0.00497487	0.00497487	0.00497487	0.00667899	0.00491228	0.00333333	0.00497487
	10	swpo	0.0210338	0.0210338	0.0210338	0.0210338	0.0210338	0.0210338	0.0210338
	11	yams	0.0210338	0.0210338	0.0210338	0.0210338	0.0210338	0.0210338	0.0210338
	12	cass	0.0264	0.0264	0.0264	0.0264	0.0264	0.0264	0.0264
	13	orts	0.0210338	0.0210338	0.0210338	0.0210338	0.0210338	0.0210338	0.0210338
	14	bean	0.0216667	0.015	0.0216667	0.0216667	0.0216667	0.0333333	0.0166667
	15	chic	0.022716	0.022716	0.022716	0.022716	0.022716	0.022716	0.022716
	16	cowp	0.025	0.0366667	0.025	0.025	0.025	0.0133333	0.025
	17	pige	0.022716	0.022716	0.022716	0.022716	0.022716	0.022716	0.022716
	18	lent	0.022716	0.022716	0.022716	0.022716	0.022716	0.022716	0.022716
	19	opul	0.022716	0.022716	0.022716	0.022716	0.022716	0.022716	0.022716
	20	soyb	0.0214815	0.0214815	0.0214815	0.0214815	0.0222222	0.0292063	0.0130159
	21	grou	0.022716	0.022716	0.022716	0.022716	0.022716	0.022716	0.022716
	24	sunf	0.022716	0.022716	0.022716	0.022716	0.022716	0.022716	0.022716
	25	rape	0.022716	0.022716	0.022716	0.022716	0.022716	0.022716	0.022716
	26	sesa	0.022716	0.022716	0.022716	0.022716	0.022716	0.022716	0.022716
	27	ooil	0.022716	0.022716	0.022716	0.022716	0.022716	0.022716	0.022716
	28	sugc	0.0210338	0.0210338	0.0210338	0.0210338	0.0210338	0.0210338	0.0210338
	29	sugb	0.0210338	0.0210338	0.0210338	0.0210338	0.0210338	0.0210338	0.0210338
		mean	0.0217687	0.022084	0.0229303	0.0219266	0.0213244	0.0229429	0.0194038
		min	0.00497487
		max	0.0339169
